# Supplementary material
Source: MDPI journal article supplement (https://www.mdpi.com/1424-2818/15/12/1159)
Supplement: s1 [file s1]

1    **SUPPLEMENTARY MATERIAL**

2    **Quantifying Abundance and Mapping Distribution of Loggerhead Turtles in the Mediterranean Sea using Aerial**  
3    **Surveys: Implications for Conservation**

4

5    Pierantonio Nino<sup>\*1</sup>, Panigada Simone<sup>1</sup>, Lauriano Giancarlo<sup>2</sup>

6    1 Tethys Research Institute, Viale G. B. Gadio 2, 20121, Milano, Italy

7    2 The Italian Institute for Environmental Protection and Research, ISPRA, Via V. Brancati 48, 00144, Roma, Italy

8    \* Corrisponding Author

9

10   **E-MAIL ADDRESSES & ORCID:**

11   Pierantonio Nino (nino.pierantonio@protonmail.com; ORCID: 0000-0002-1210-8831); Lauriano Giancarlo  
12   (giancarlo.lauriano@isprambiente.it; ORCID: 0000-0003-3465-6078); Panigada Simone (panigada69@gmail.com;  
13   ORCID: 0000-0003-0856-1227)

14

15

16

17

18

19

20

21

22

23

24

25

26

27

28

29

30

31

32

33

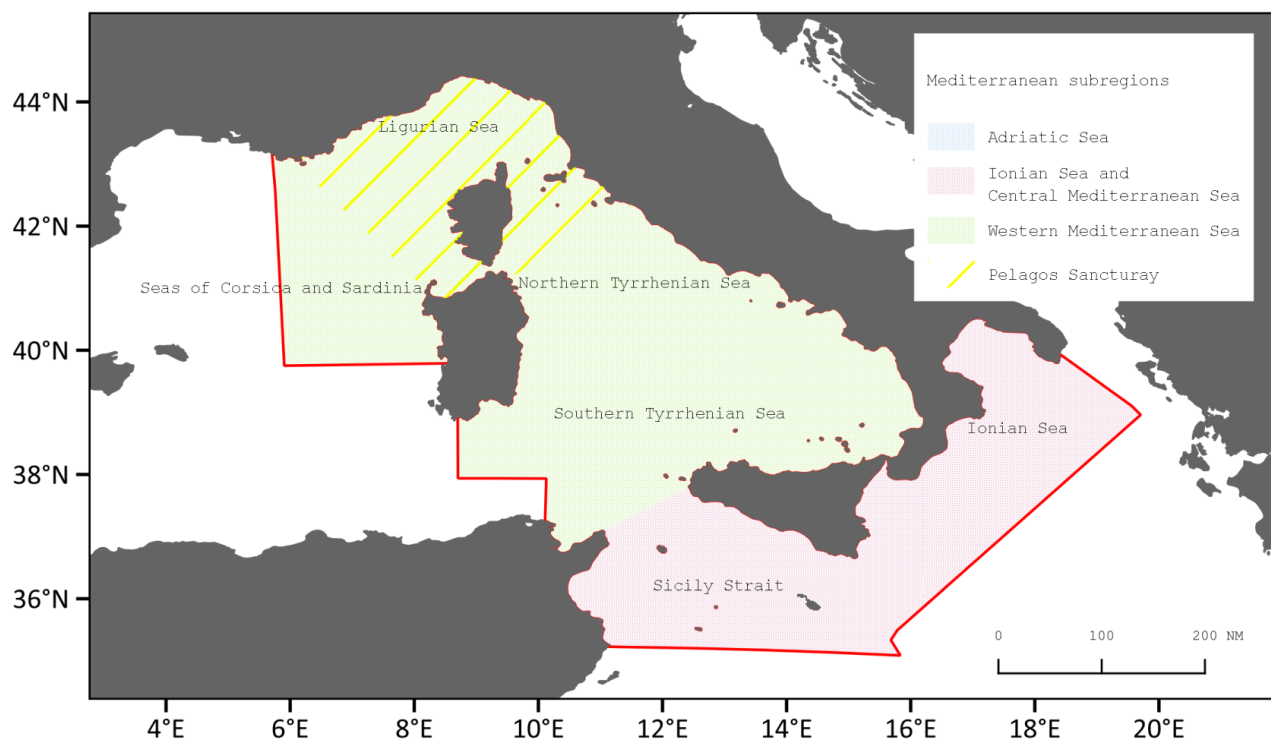

34 **Figure S1** – Overall monitored area between 2009 and 2016 with highlighted overlapping portion of Marine  
 35 Subregions as delineated under the Marine Strategy Framework Directive. Geodatabases used to produce the  
 36 map available at <https://www.eea.europa.eu/data-and-maps/data/europe-seas-1>

37

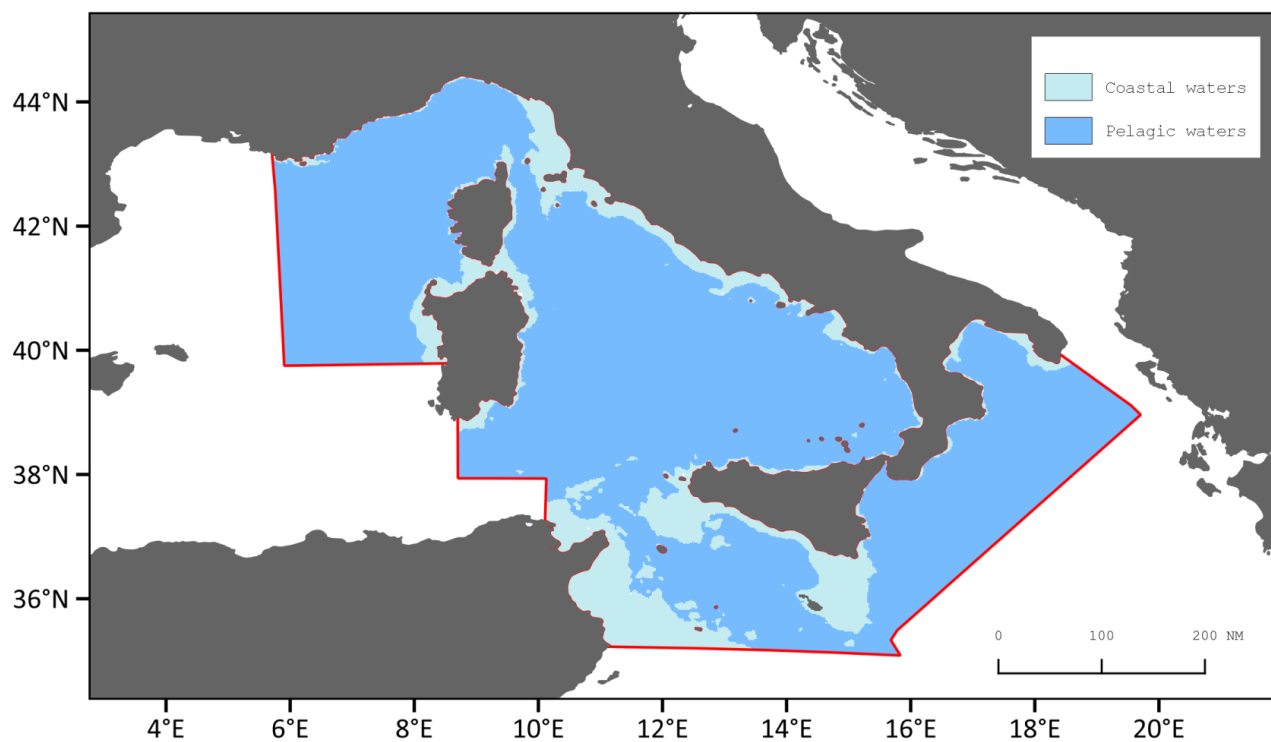

38 **Figure S2** – Depth of the overall surveyed area classified in coastal (depth between 0 and 200 meters) and deep  
 39 waters (depth greater than 200 meters). Depth reclassification was based on the ETOPO1 Global Relief Model  
 40 (Amante and Eakins, 2009)

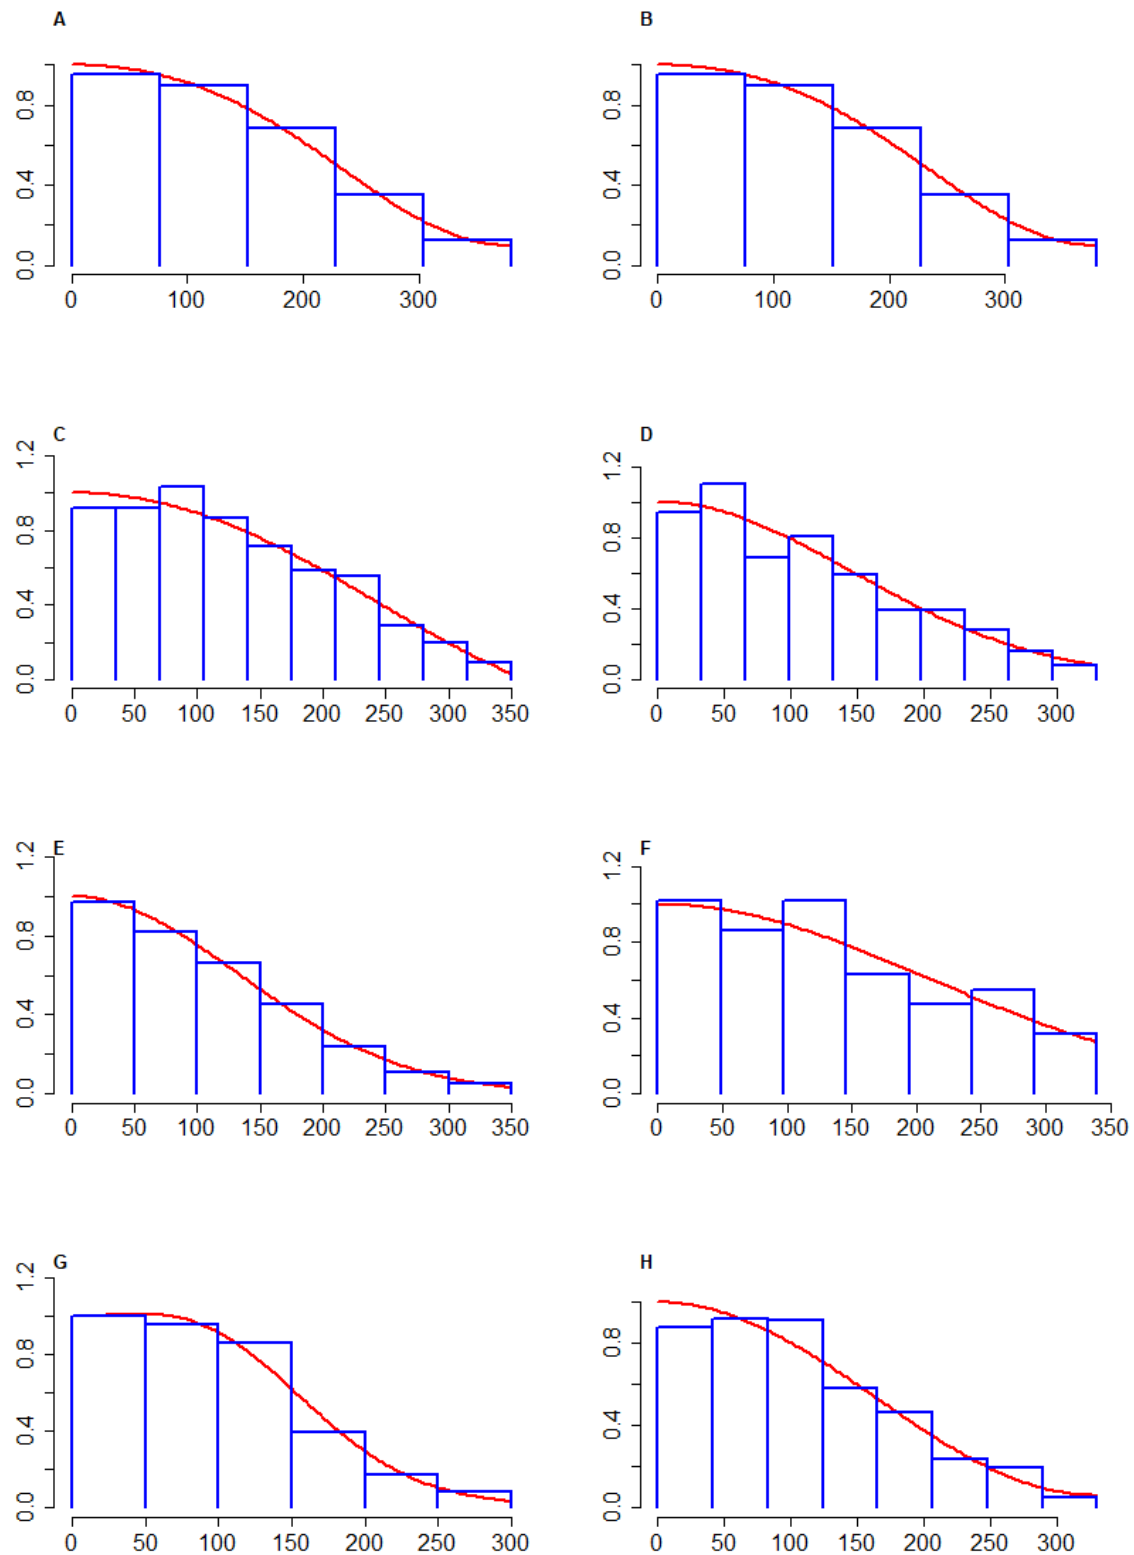

41 **Figure S3** – Detection functions for Conventional Distance Sampling (CDS) analysis for each survey and area.  
 42 Details on selected models are provided in Table 3. A= Extended Pelagos Area (2010); B= Sicily Channel (2016);  
 43 C= Central Tyrrhenian Sea (2010); D= Central Tyrrhenian Sea (2013); E= Ionian sea (2010); F= Pelagos Sanctuary  
 44 (2010); G= Southern Tyrrhenian Sea (2010-2011); H= Southern Tyrrhenian Sea (2014). For the detection functions  
 45 and related information for the 2009 winter and summer surveys refer to Lauriano et al., (2011)

47   **References**

48   Amante C, Eakins BW (2009) ETOPO1 Global Relief Model converted to PanMap layer format. NOAA-National  
49   Geophysical Data Center

50   Lauriano G, Panigada S, Casale P, et al (2011) Aerial survey abundance estimates of the loggerhead sea turtle  
51   Caretta caretta in the Pelagos Sanctuary, northwestern Mediterranean Sea. Marine Ecology Progress Series  
52   437:291–302. <https://doi.org/10.3354/meps09261>

53
